# Supplementary figures and images for: Target gene mutational pattern in Lynch syndrome colorectal carcinomas according to tumour location and germline mutation
Source: PubMed Central journal article supplement — Br J Cancer. 2015 Aug 6;113(4):686–92. doi: 10.1038/bjc.2015.281 (PMC4647680; doi:10.1038/bjc.2015.281), 2015-08-06

# Supplementary Figure 1

A

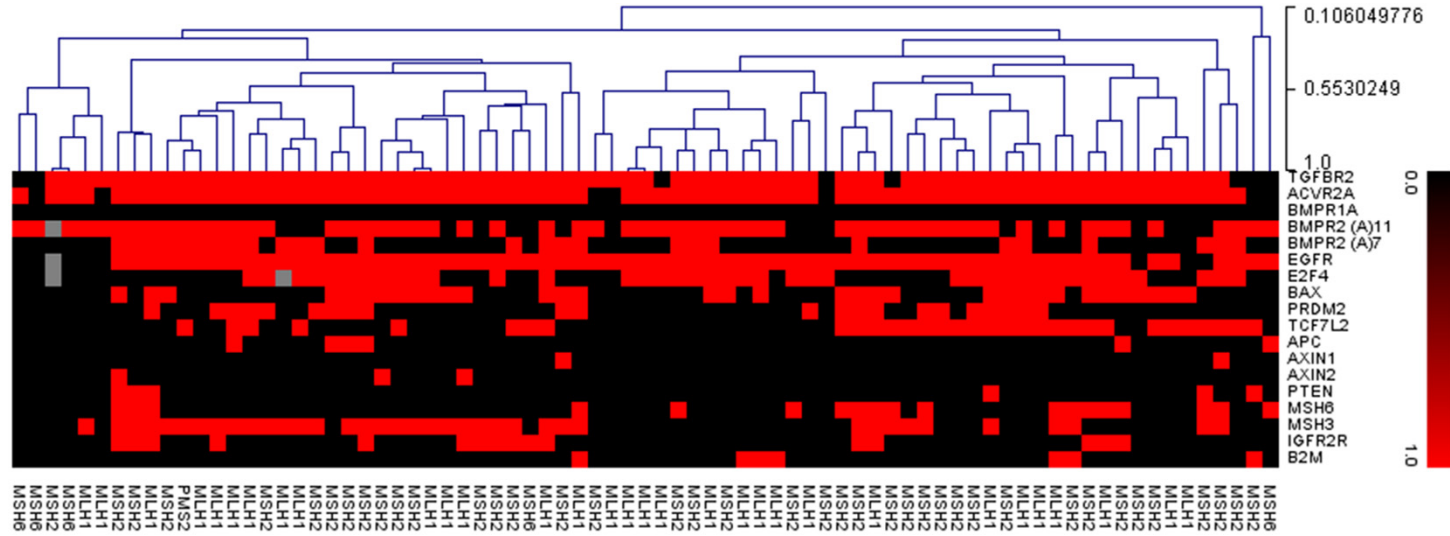

B

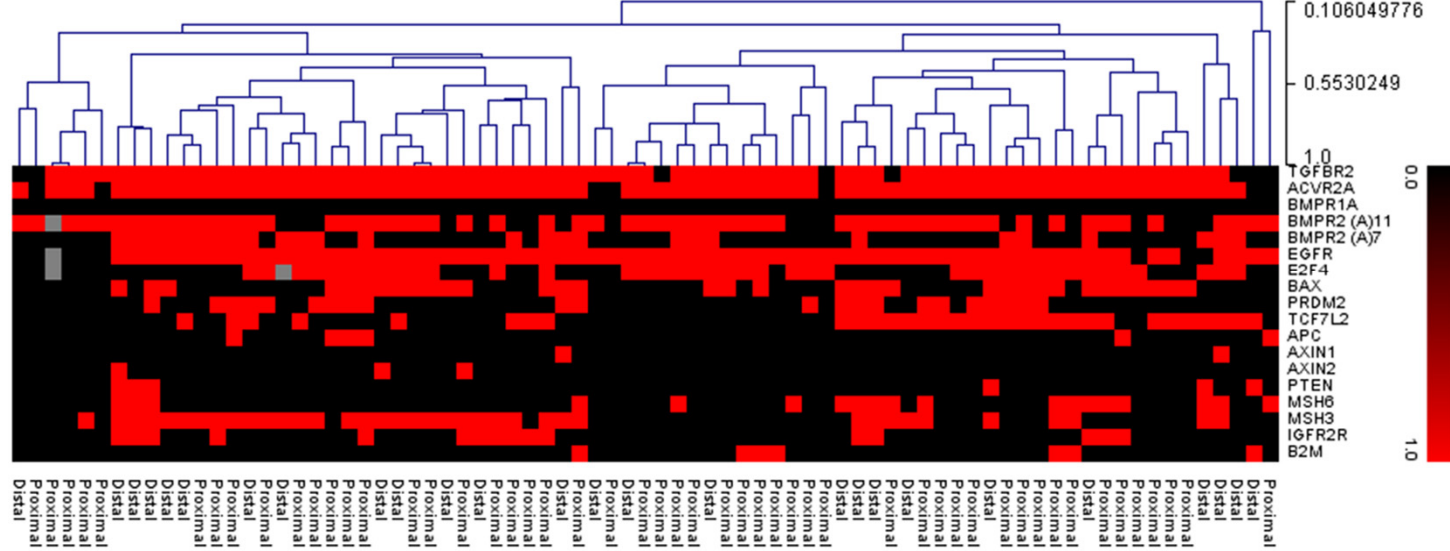

Supplement: bjc2015281x1.pdf [file bjc2015281x1.pdf]
